# Supplementary material for: Polyvinylpyrrolidone gel based Pt/Ni(OH)2 heterostructures with redistributing charges for enhanced alkaline hydrogen evolution reaction
Source: Royal Society of Chemistry journal article supplement (doi:10.1039/d1ta06149f), 2021-01-01
Supplement: d1ta06149f1.pdf [file d1ta06149f1.pdf]

## Supporting Information

### Polyvinylpyrrolidone Gel Based Pt/Ni(OH)<sub>2</sub> Heterostructures with Redistributing Charges for Enhanced Alkaline Hydrogen Evolution Reaction

Jin Li<sup>†,a</sup>, Bo Li<sup>†,b</sup>, He Huang<sup>\*,b,c</sup>, Shuo Yan,<sup>a</sup> Changzhou Yuan<sup>\*,d</sup>, Naiteng Wu,<sup>a</sup> Donglei Guo,<sup>a</sup> Xianming Liu<sup>\*a</sup>

*<sup>a</sup>College of Chemistry and Chemical Engineering, and Henan Key Laboratory of Function-Oriented Porous Materials, Luoyang Normal University, Luoyang 471934, E-mail: myclxm@163.com*

*<sup>b</sup>School of Materials Science and Engineering, University of Science and Technology Beijing, Beijing 100083, China*

*<sup>c</sup>Department of Mechanical and Aerospace Engineering, Hong Kong University of Science and Technology, Clear Water Bay, Kowloon, Hong Kong, China, E-mail: hhuangae@connect.ust.hk*

*<sup>d</sup>School of Materials Science & Engineering, University of Jinan, Jinan, 250022 P. R. China, E-mail: mse\_yuancz@ujn.edu.cn*

*<sup>†</sup>These authors contributed equally to this work*

*\*Corresponding authors*

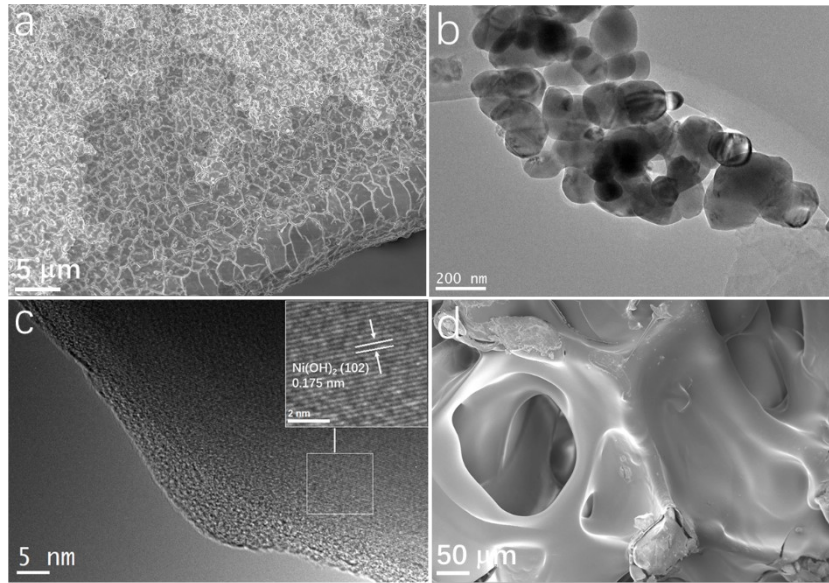

**Figure S1.** (a) FESEM, (b) TEM and (c) HRTEM images of Ni(OH)<sub>2</sub>. (d) FESEM image of PVP@NF.

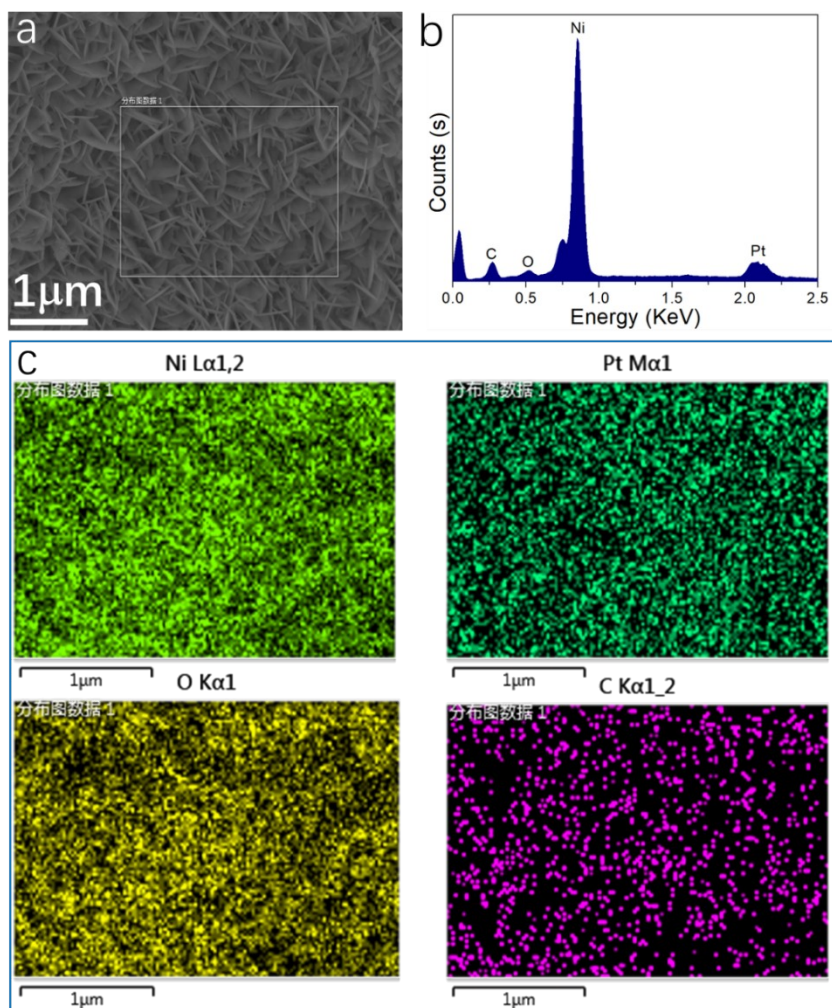

**Figure S2.** (a) FESEM, (b) EDX and (c) the corresponding elemental mapping images of Pt/Ni(OH)<sub>2</sub>@NF.

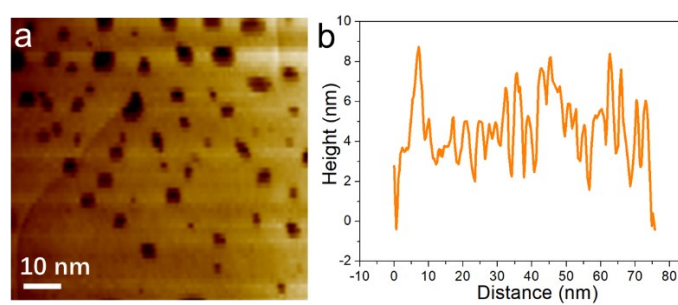

**Figure S3.** (a) High-resolution AFM image and (b) thickness profile of PVP@Pt/Ni(OH)<sub>2</sub>@NF sample.

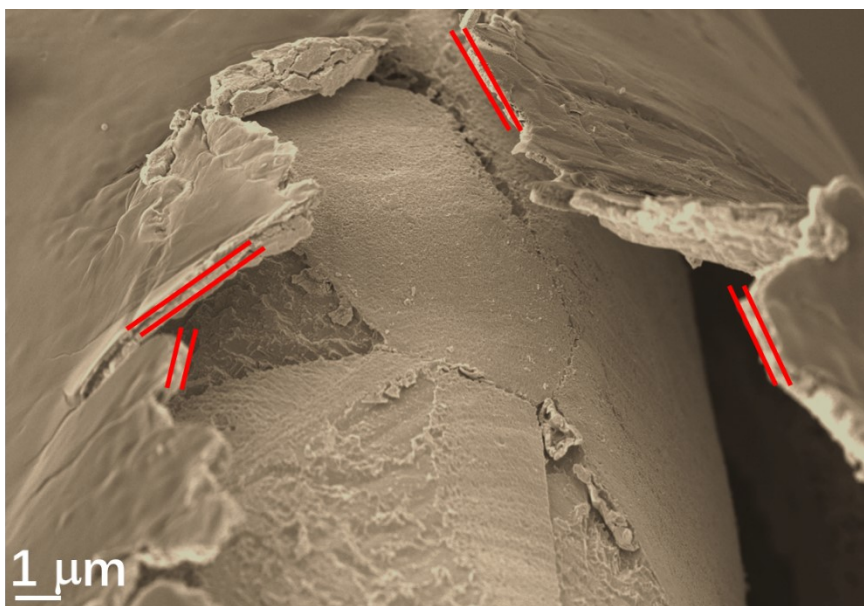

**Figure S4.** The FESEM images of PVP@Pt/Ni(OH)<sub>2</sub>@NF sample.

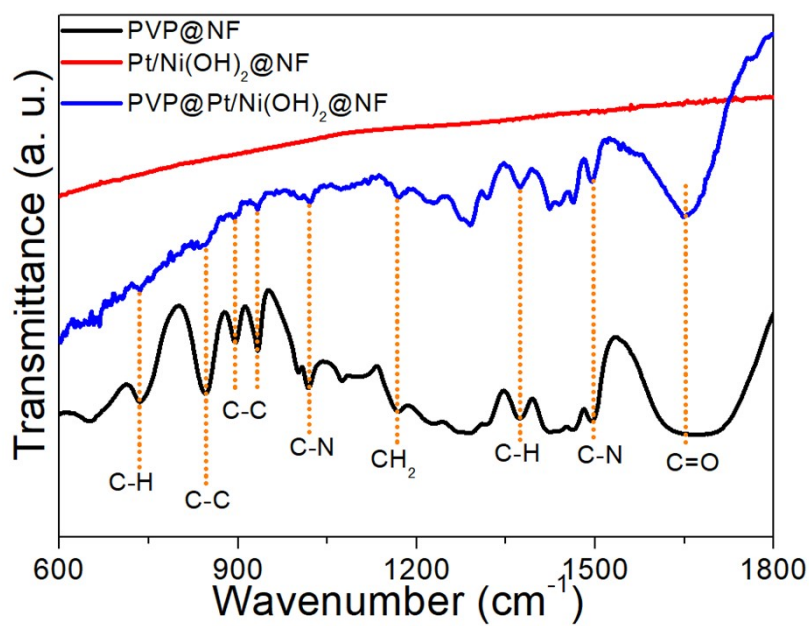

**Figure S5.** FTIR spectra of PVP@NF, Pt/Ni(OH)<sub>2</sub>@NF and PVP@Pt/Ni(OH)<sub>2</sub>@NF.

Typical peaks of PVP can be observed in the PVP@NF and PVP@Pt/Ni(OH)<sub>2</sub>@NF spectrum, in detail: symmetric C=O stretching modes at 1650 cm<sup>-1</sup>, C-N ring stretching mode at 1496 cm<sup>-1</sup>, C-H bending mode at 1373 cm<sup>-1</sup>, weak ring CH<sub>2</sub> twisting mode at 1168 cm<sup>-1</sup>, C-N stretching mode at 1020 cm<sup>-1</sup>, C-C ring breathing mode at 932 cm<sup>-1</sup>, C-C ring mode at 894 cm<sup>-1</sup>, out-of-plane C-H bending mode at 846 cm<sup>-1</sup>, and C-H rocking mode at 734 cm<sup>-1</sup>.<sup>1,2</sup>

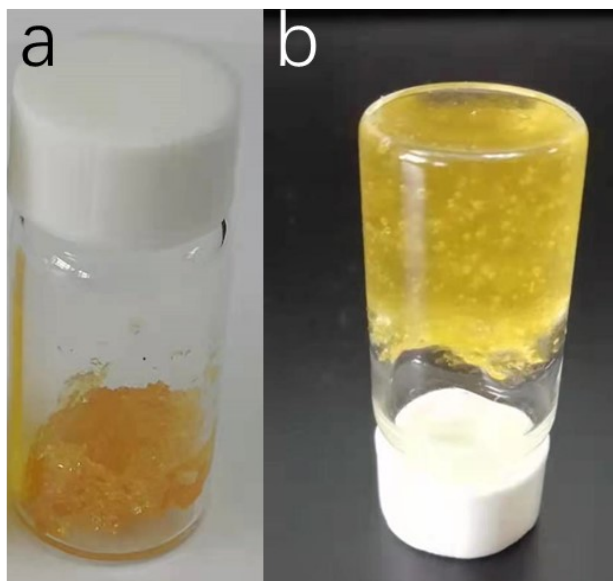

**Figure S6.** The photograph of (a) PVP gels scraped from PVP@Pt/Ni(OH)<sub>2</sub>@NF and (b) the corresponding hydrogels after swelling.

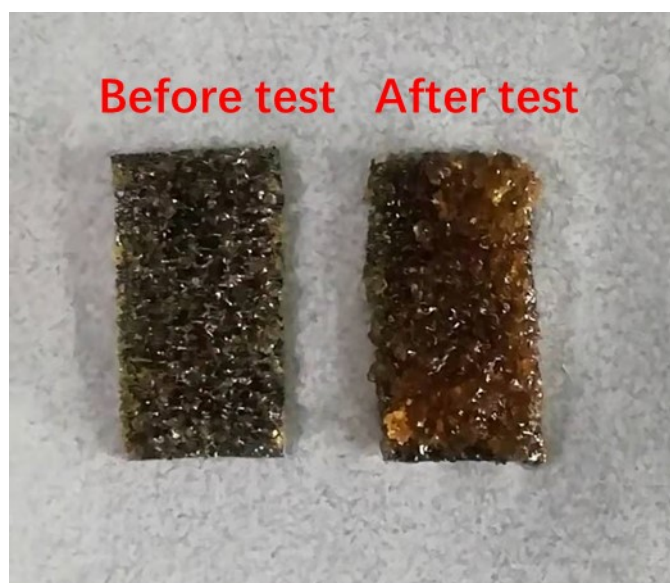

**Figure S7.** The typical optical photographs before and after HER test for PVP@Pt/Ni(OH)<sub>2</sub>@NF

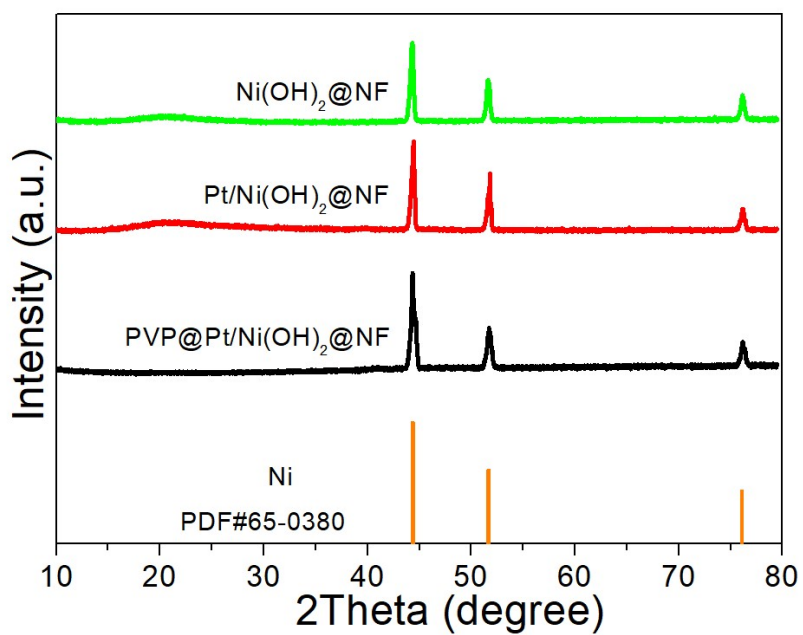

**Figure S8.** XRD pattern of Ni(OH)<sub>2</sub>@NF, Pt/Ni(OH)<sub>2</sub>@NF, PVP@Pt/Ni(OH)<sub>2</sub>@NF and the standard PDF card of Ni (orange line).



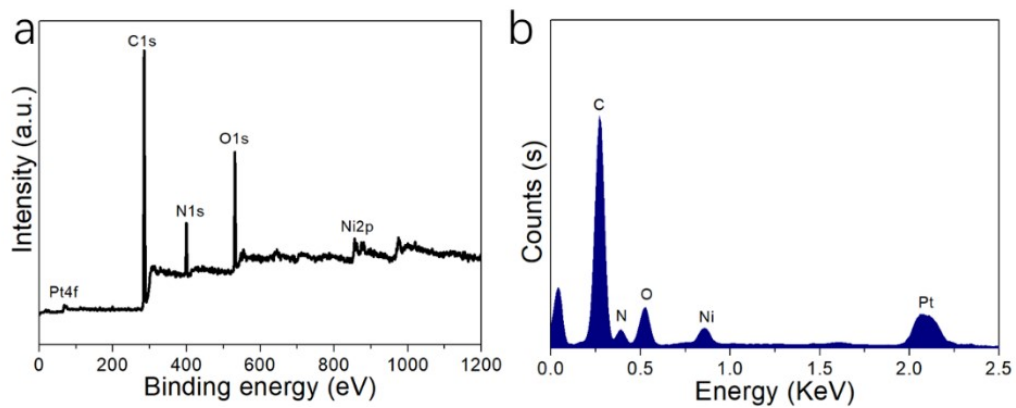

**Figure S9.** XPS survey and EDX spectrum of PVP@Pt/Ni(OH)<sub>2</sub>@NF.

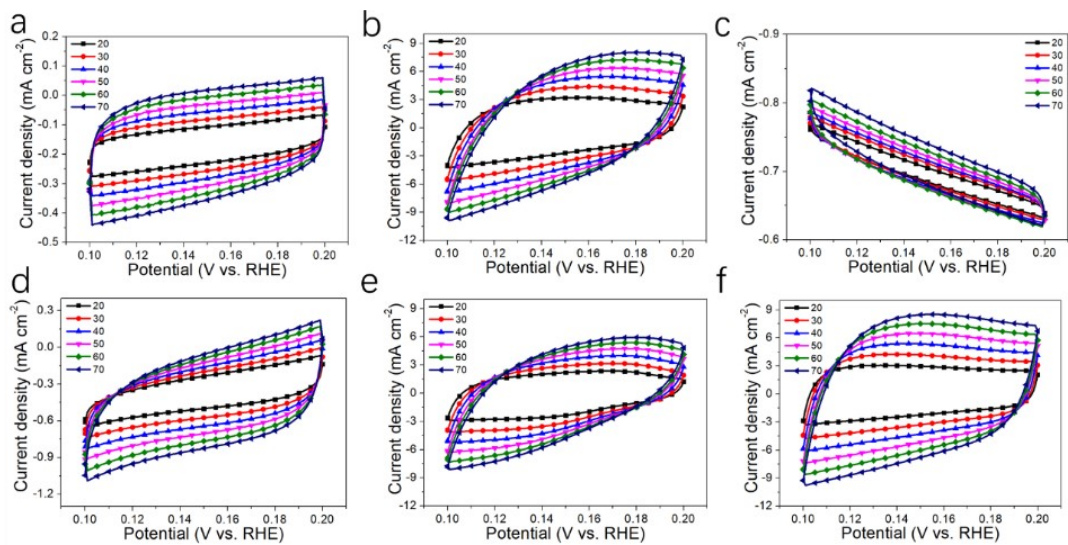

**Figure S10.** CV curves of (a) NF, (b) Pt/C, (c) PVP@NF, (d) Ni(OH)<sub>2</sub>@NF, (e) Pt/Ni(OH)<sub>2</sub>@NF, and (f) PVP@Pt/Ni(OH)<sub>2</sub>@NF measured in a non-Faradic region at the scan rates of 20, 30, 40, 50, 60, and 70 mV s<sup>-1</sup>.



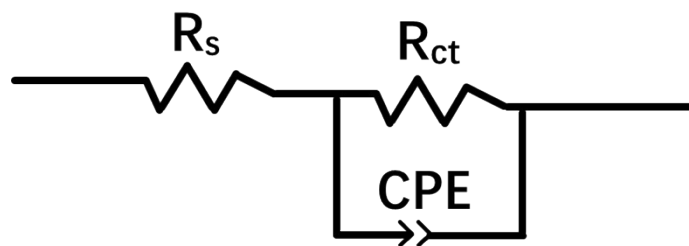

**Figure S11.** The equivalent circuit models.

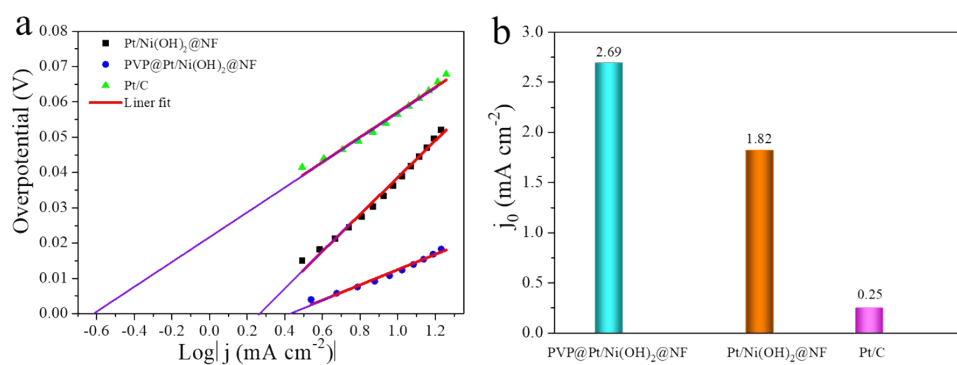

**Figure S12.** Exchange current densities ( $j_0$ ) of the PVP@Pt/Ni(OH)<sub>2</sub>@NF, Pt/Ni(OH)<sub>2</sub>@NF, and commercial Pt/C catalysts in 1.0 M KOH.

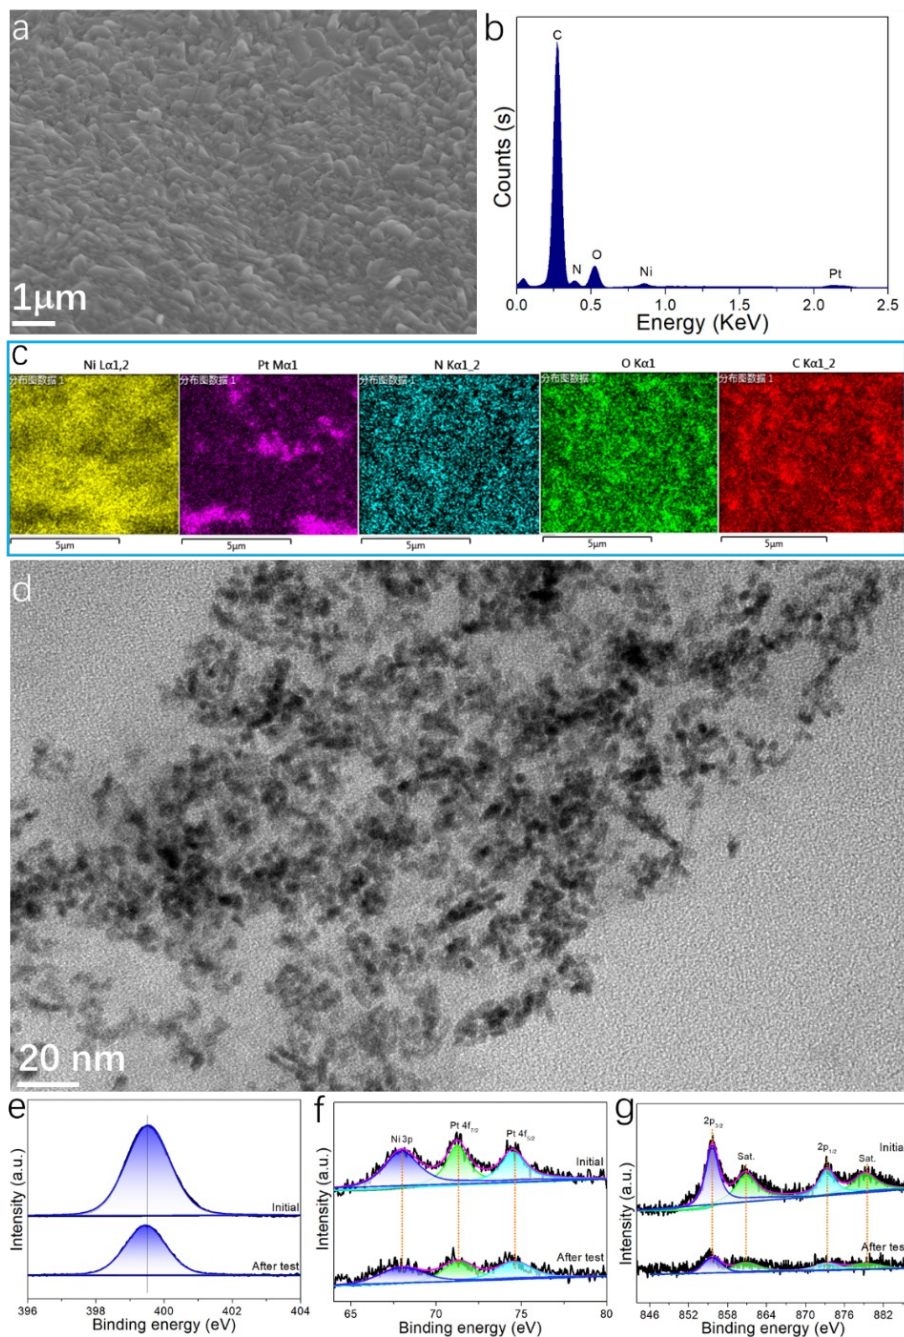

**Figure S13.** (a) FESEM, (b)EDX, (c) the corresponding elemental mapping images and (d) TEM of PVP@Pt/Ni(OH)<sub>2</sub>@NF after stability test. XPS spectra of (e) Ni 1s, (f) Pt 4f and (g) Ni 2p for PVP@Pt/Ni(OH)<sub>2</sub>@NF before and after the durability tests.

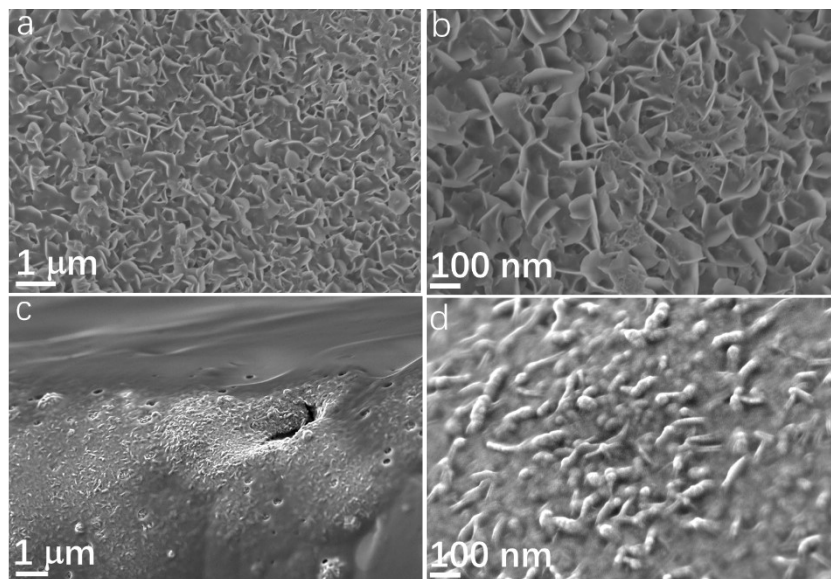

**Figure S14.** The FESEM images of PVP@Pt/Ni(OH)<sub>2</sub>@NF with 40 mg PVP (a,b) and 70 mg PVP (c,d).

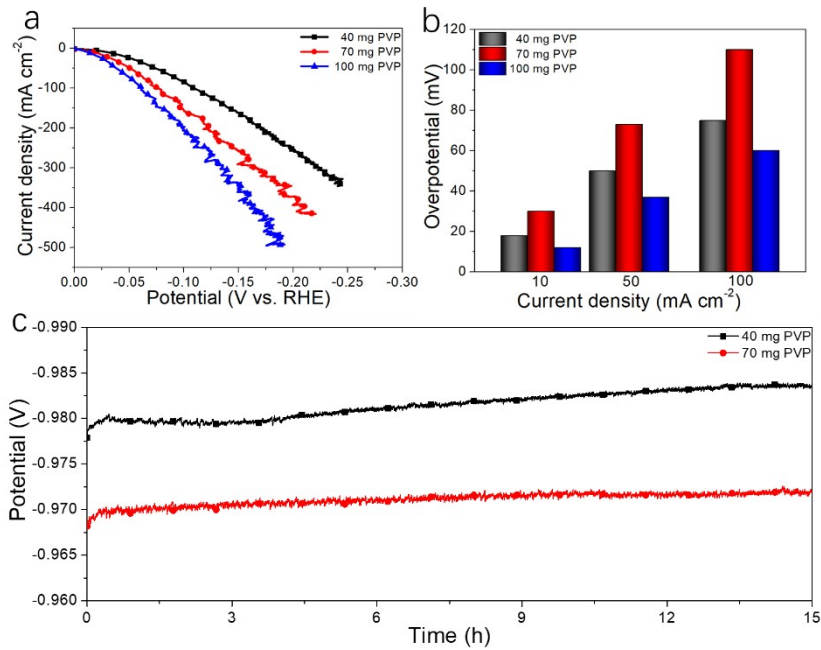

**Figure S15.** (a) LSV curves and (b) overpotentials of PVP@Pt/Ni(OH)<sub>2</sub>@NF prepared with 40, 70, and 100 mg PVP. (c) Chronopotentiometry test of PVP@Pt/Ni(OH)<sub>2</sub>@NF prepared with 40 and 70 mg PVP at 10 mA cm<sup>-2</sup> for 15 h without *IR* compensation.

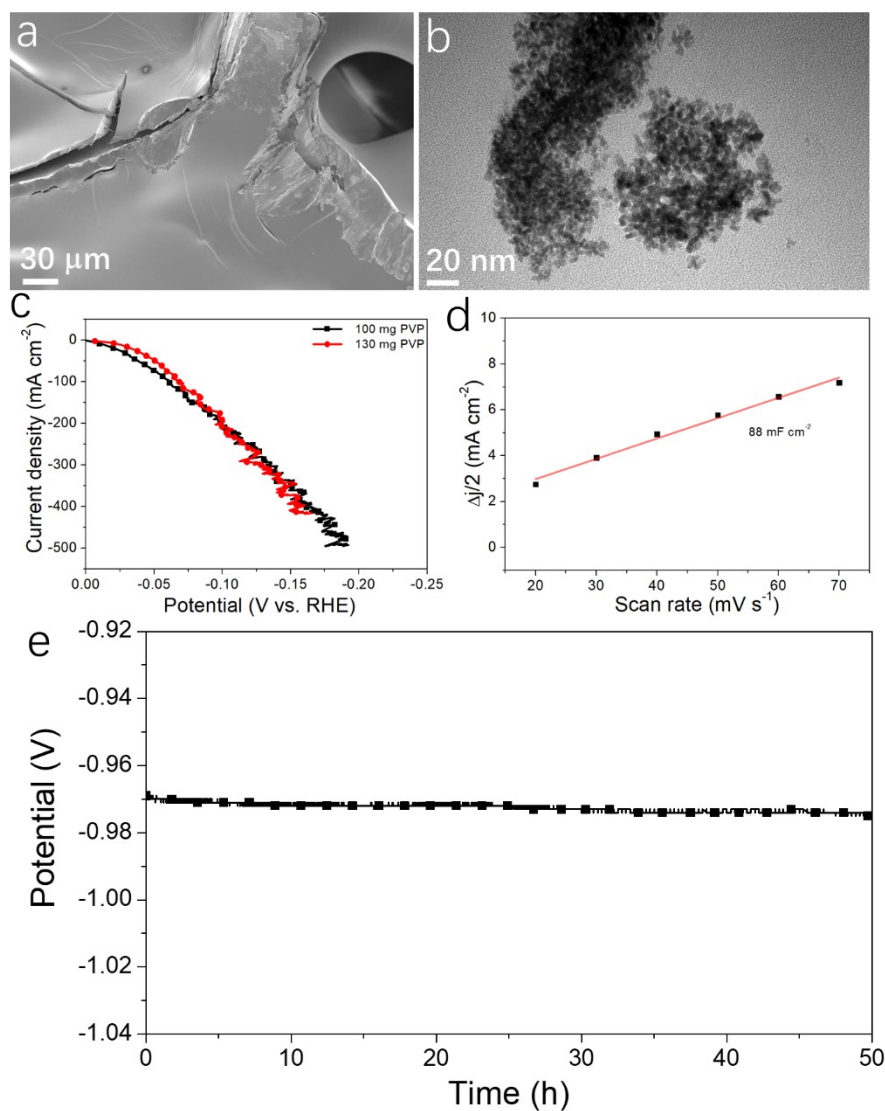

**Figure S16.** The FESEM (a) and TEM (b) images of PVP@Pt/Ni(OH)<sub>2</sub>@NF prepared with 130 mg PVP. (c) The corresponding LSV curves, (d) electrochemical double-layer capacitances, and (e) Chronopotentiometry test at 10 mA cm<sup>-2</sup> for 50 h without *IR* compensation.

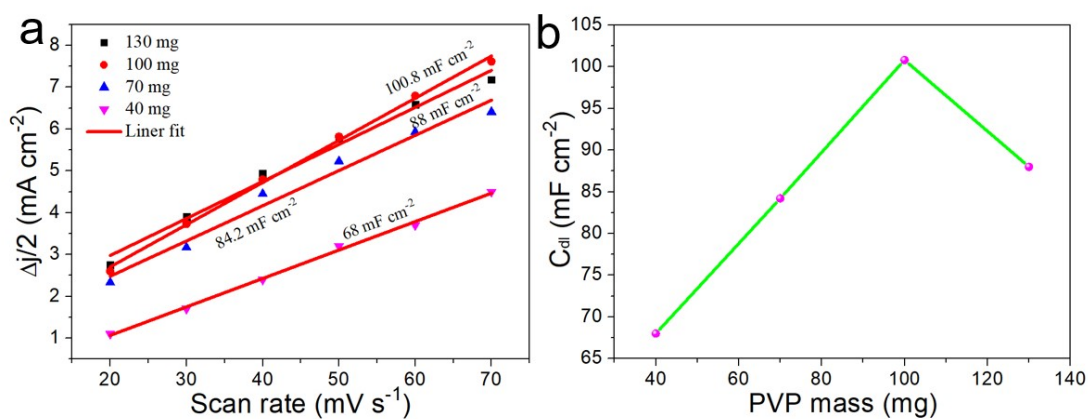

**Figure S17.** (a) The electrochemical double-layer capacitances for different PVP mass. (b) The plot of the relationships between PVP mass and electrochemical double-layer capacitances.

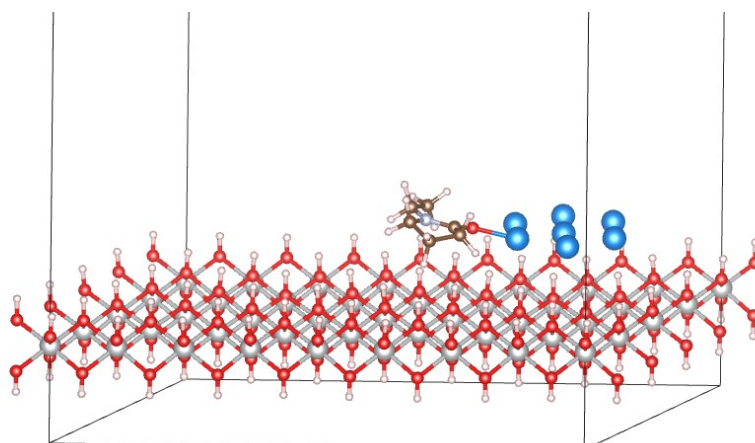

**Figure S18.** Optimized configuration of PVP@Pt/Ni(OH)<sub>2</sub> catalyst surface. The silver, red, pink, blue, brown, and orange balls represent Ni, O, H, Pt, C, and N atoms, respectively.



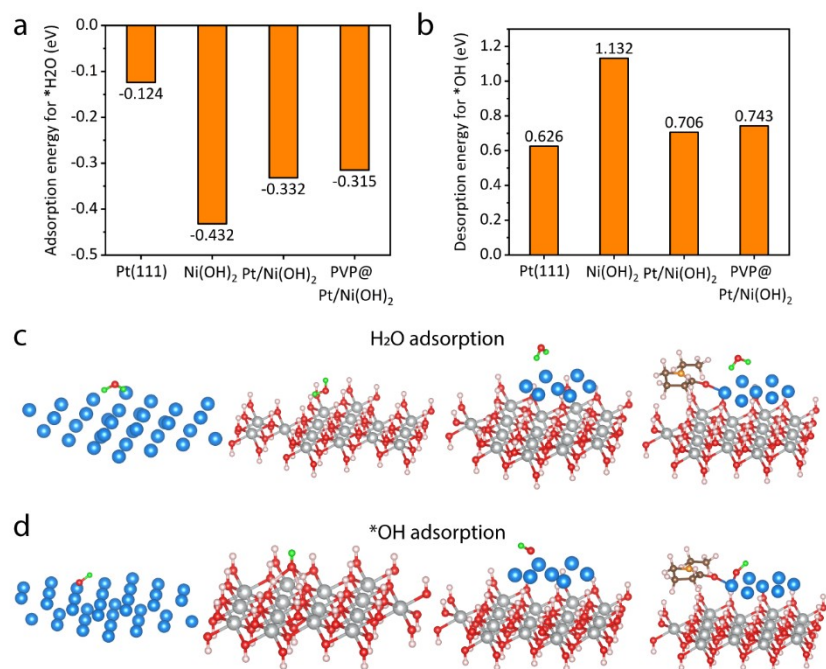

**Figure S19.** (a) Adsorption energies of H<sub>2</sub>O and (b) desorption energies of OH. (c) and (d) exhibit the corresponding optimized configurations.

**Table S1.** The HER performance of PVP@Pt/Ni(OH)<sub>2</sub>@NF compared with other catalysts at a current density of 10 mA cm<sup>-2</sup> in 1.0 M KOH.

| Catalysts                                          | Overpotential<br>(mV) | Tafel slope<br>(mV dec <sup>-1</sup> ) | References |
|----------------------------------------------------|-----------------------|----------------------------------------|------------|
| <b>PVP@Pt/Ni(OH)<sub>2</sub>@NF</b>                | 12                    | 21.5                                   | This work  |
| <b>PtNi<sub>5</sub>-0.3</b>                        | 12.8                  | 14.1                                   | 3          |
| <b>RuNi/CQDs</b>                                   | 13                    | 48                                     | 4          |
| <b>Ni<sub>3</sub>N/Pt</b>                          | 50                    | 36.5                                   | 5          |
| <b>MoP@NCHs</b>                                    | 92                    | 62                                     | 6          |
| <b>Pt-Co(OH)<sub>2</sub>/CC</b>                    | 32                    | 70                                     | 7          |
| <b>Co-NMS/CA</b>                                   | 89                    | 62                                     | 8          |
| <b>PtNi-O/C</b>                                    | 39.8                  | 78.8                                   | 9          |
| <b>Ru/Ni(OH)<sub>2</sub>/NF</b>                    | 25                    | 47                                     | 10         |
| <b>Pt-Ni ASs</b>                                   | 27.7                  | 27                                     | 11         |
| <b>Pt-Ni(N) NWs</b>                                | 13                    | 29                                     | 12         |
| <b>Ru-MoO<sub>2</sub></b>                          | 44                    | 29                                     | 13         |
| <b>Pt<sub>2</sub>Ni<sub>3</sub>-P</b>              | 44                    | 66                                     | 14         |
| <b>Pt/NiRu-OH</b>                                  | 38                    | 29                                     | 15         |
| <b>RuNi NSs</b>                                    | 15                    | 28                                     | 16         |
| <b>Pt@Fe-N-C</b>                                   | 60                    | 42                                     | 17         |
| <b>Ru/OMSNNC</b>                                   | 13                    | 40.41                                  | 18         |
| <b>PtNi@Ti<sub>3</sub>C<sub>2</sub></b>            | 36                    | 59                                     | 19         |
| <b>Ru@MWCNT</b>                                    | 17                    | 27                                     | 20         |
| <b>Ni<sub>17</sub>W<sub>3</sub>/WO<sub>2</sub></b> | 48                    | 33                                     | 21         |
| <b>Ni<sub>2</sub>P-NiSe<sub>2</sub></b>            | 66                    | 72.6                                   | 22         |
| <b>Co-Mo<sub>5</sub>N<sub>6</sub></b>              | 19                    | 29                                     | 23         |
| <b>DSIrNi@CNTS</b>                                 | 17                    | 10                                     | 24         |
| <b>Pt<sub>at</sub>-CoP MNSs/CFC</b>                | 13                    | 30.28                                  | 25         |
| <b>ES-WC/W<sub>2</sub>C</b>                        | 75                    | 59                                     | 26         |

|                         |      |       |    |
|-------------------------|------|-------|----|
| <b>RhSe<sub>2</sub></b> | 81.6 | 96    | 27 |
| <b>Ru-NBCs</b>          | 14   | 36.19 | 28 |
| <b>CoP NS/CNTs</b>      | 68   | 51    | 29 |
| <b>3D RuCu NCs</b>      | 18   | 59    | 30 |
| <b>PtRu NCs/BP</b>      | 22   | 19    | 31 |

**Table S2.** Fitting parameters acquired from the EIS data with Zview software for electrocatalysts in the alkaline HER.

| Electrocatalyst                | $R_s$ ( $\Omega$ ) | $R_{ct}$ ( $\Omega$ ) | CPE-T | CPE-P |
|--------------------------------|--------------------|-----------------------|-------|-------|
| NF                             | 2.68               | 338.4                 | 0.007 | 0.83  |
| Pt/C                           | 3.15               | 2.81                  | 0.03  | 0.71  |
| PVP@NF                         | 4.05               | 120.6                 | 0.01  | 0.47  |
| Ni(OH) <sub>2</sub> @NF        | 2.86               | 60.8                  | 0.001 | 0.79  |
| Pt/Ni(OH) <sub>2</sub> @NF     | 2.12               | 3.38                  | 0.01  | 0.76  |
| PVP@Pt/Ni(OH) <sub>2</sub> @NF | 2.72               | 0.85                  | 0.04  | 0.61  |

$R_s$  = solution resistance;  $R_{ct}$  = charge transfer resistance; CPE-T/CPE-P = constant phase element.

### References for the supporting information

1. M. Contardi, D. Kossyvaki, P. Picone, M. Summa, X. Guo, J. A. Heredia-Guerrero, D. Giacomazza, R. Carzino, L. Goldoni, G. Scoconi, F. Rancan, R. Bertorelli, M. Di Carlo, A. Athanassiou and I. S. Bayer, *Chem. Eng. J.*, 2021, **409**, 128144.
2. A. Kedia and P. S. Kumar, *The Journal of Physical Chemistry C*, 2012, **116**, 23721-23728.
3. C. Zhang, X. Liang, R. Xu, C. Dai, B. Wu, G. Yu, B. Chen, X. Wang and N. Liu, *Adv. Funct. Mater.*, 2021, **31**, 2008298.
4. Y. Liu, X. Li, Q. Zhang, W. Li, Y. Xie, H. Liu, L. Shang, Z. Liu, Z. Chen, L. Gu, Z. Tang, T. Zhang and S. Lu, *Angew. Chem. Int. Ed.*, 2020, **59**, 1718-1726.
5. Y. Wang, L. Chen, X. Yu, Y. Wang and G. Zheng, *Adv. Funct. Mater.*, 2017, **7**, 1601390.
6. D. Zhao, K. Sun, W. C. Cheong, L. Zheng, C. Zhang, S. Liu, X. Cao, K. Wu, Y. Pan, Z. Zhuang, B. Hu, D. Wang, Q. Peng, C. Chen and Y. Li, *Angew. Chem.*, 2019, **132**, 9067-9075.
7. Z. Xing, C. Han, D. Wang, Q. Li and X. Yang, *ACS Catal.*, 2017, **7**, 7131-7135.
8. L. Zhang, Y. Zheng, J. Wang, Y. Geng, B. Zhang, J. He, J. Xue, T. Frauenheim and M. Li, *Small*, 2021, **17**, e2006730.
9. Z. Zhao, H. Liu, W. Gao, W. Xue, Z. Liu, J. Huang, X. Pan and Y. Huang, *J. Am. Chem. Soc.*, 2018, **140**, 9046-9050.
10. Q.-Q. Chen, X. Yang, C.-C. Hou, K. Li and Y. Chen, *J. Mater. Chem. A*, 2019, **7**, 11062-11068.
11. Z. Zhang, G. Liu, X. Cui, B. Chen, Y. Zhu, Y. Gong, F. Saleem, S. Xi, Y. Du, A. Borgna, Z. Lai, Q. Zhang, B. Li, Y. Zong, Y. Han, L. Gu and H. Zhang,

- Adv. Mater.*, 2018, **30**, e1801741.
12. Y. Xie, J. Cai, Y. Wu, Y. Zang, X. Zheng, J. Ye, P. Cui, S. Niu, Y. Liu, J. Zhu, X. Liu, G. Wang and Y. Qian, *Adv. Mater.*, 2019, **31**, e1807780.
  13. F. Yu, H. Zhou, Y. Huang, J. Sun, F. Qin, J. Bao, W. A. Goddard, S. Chen and Z. Ren, *Nat. Commun.*, 2018, **9**, 2551.
  14. P. Wang, Q. Shao, J. Guo, L. Bu and X. Huang, *Chem. Mater.*, 2020, **32**, 3144-3149.
  15. D. Li, X. Chen, Y. Lv, G. Zhang, Y. Huang, W. Liu, Y. Li, R. Chen, C. Nuckolls and H. Ni, *Appl. Catal., B-Environ.*, 2020, **269**, 118824.
  16. G. Liu, W. Zhou, B. Chen, Q. Zhang, X. Cui, B. Li, Z. Lai, Y. Chen, Z. Zhang, L. Gu and H. Zhang, *Nano Energy*, 2019, **66**, 104173.
  17. X. Zeng, J. Shui, X. Liu, Q. Liu, Y. Li, J. Shang, L. Zheng and R. Yu, *Adv. Funct. Mater.*, 2018, **8**, 1701345.
  18. Y. L. Wu, X. Li, Y. S. Wei, Z. Fu, W. Wei, X. T. Wu, Q. L. Zhu and Q. Xu, *Adv. Mater.*, 2021, **33**, 2006965.
  19. Y. Yan, R. Zhang, Y. Yu, Z. Sun, R. Che, B. Wei, A. P. LaGrow, Z. Wang and W. Zhou, *Appl. Catal., B-Environ.*, 2021, **291**, 120100.
  20. D. H. Kweon, M. S. Okyay, S. J. Kim, J. P. Jeon, H. J. Noh, N. Park, J. Mahmood and J. B. Baek, *Nat. Commun.*, 2020, **11**, 1278.
  21. W. Xu, B. Wang, X. Ni, H. Liu, W. Wang, L. Zhang, H. Zhang, Z. Peng and Z. Liu, *ACS Appl. Mater. Interfaces*, 2021, **13**, 13838-13847.
  22. C. Liu, T. Gong, J. Zhang, X. Zheng, J. Mao, H. Liu, Y. Li and Q. Hao, *Appl. Catal., B-Environ.*, 2020, **262**, 118245.
  23. F. Lin, Z. Dong, Y. Yao, L. Yang, F. Fang and L. Jiao, *Adv. Funct. Mater.*, 2020, **10**, 2002176.
  24. S. Liu, Z. Hu, Y. Wu, J. Zhang, Y. Zhang, B. Cui, C. Liu, S. Hu, N. Zhao, X. Han, A. Cao, Y. Chen, Y. Deng and W. Hu, *Adv. Mater.*, 2020, **32**, e2006034.
  25. S. Ye, W. Xiong, P. Liao, L. Zheng, X. Ren, C. He, Q. Zhang and J. Liu, *J. Mater. Chem. A*, 2020, **8**, 11246-11254.
  26. Z. Chen, W. Gong, S. Cong, Z. Wang, G. Song, T. Pan, X. Tang, J. Chen, W. Lu and Z. Zhao, *Nano Energy*, 2020, **68**, 104335.
  27. W. Zhong, B. Xiao, Z. Lin, Z. Wang, L. Huang, S. Shen, Q. Zhang and L. Gu, *Adv. Mater.*, 2021, **33**, 2007894.
  28. T. Wu, J. Hong, Z. Lu, H. Wu, C. Wu, Z. Tang, X. Liu, B. Zeng, Y. Xu, G. Chen, C. Yuan and L. Dai, *Appl. Catal., B-Environ.*, 2021, **285**, 119795.
  29. Y. Zhang, Y. Wang, T. Wang, N. Wu, Y. Wang, Y. Sun, L. Fu, Y. Du and W. Zhong, *Adv. Mater. Interfaces*, 2019, **7**, 1901302.
  30. D. Cao, J. Wang, H. Xu and D. Cheng, *Small*, 2020, **16**, 2000924.
  31. Y. Li, W. Pei, J. He, K. Liu, W. Qi, X. Gao, S. Zhou, H. Xie, K. Yin, Y. Gao, J. He, J. Zhao, J. Hu, T.-S. Chan, Z. Li, G. Zhang and M. Liu, *ACS Catal.*, 2019, **9**, 10870-10875.
